# Supplementary material for: The DACH1 Gene Transcriptional Activation and Protein Degradation Mediated by Transactivator Tas of Prototype Foamy Virus
Source: MDPI journal article supplement (doi:10.3390/v15091899), 2023-09-08
Supplement: s1 [file s1]

## Supplementary Materials

**Table S1.** The primers of DACH1 sequence deletion and mutation vector construction.

| Vector         | Sense primer (5'-3')                     | Antisense primer (5'-3')               |
|----------------|------------------------------------------|----------------------------------------|
| pGL3-DACH1-dS1 | TAGGGGTACCAAGGACTTTCCAAAACACTACAGC       |                                        |
| pGL3-DACH1-dS2 | TAGGGGTACCCATCCACATCAAGGCAAGC            | GCGAAGATCTCACAAAAGTGTCGCCGAAG          |
| pGL3-DACH1-dS3 | TAGGGGTACCCCACTTGAAAACGTCTCTG            |                                        |
| pGL3-DACH1-dS4 |                                          | GCGAAGATCTCTGGACGAGTTGTGTGTGT          |
| pGL3-DACH1-dS5 |                                          | GCGAAGATCTAGAGGGAGCGTGCGAGG            |
| pGL3-DACH1-dS6 | TAGGGGTACCAAGGACTTTCCAAAACACTACAGC       | GCGAAGATCTCTTCTCTTCTACTACTACCGTTA      |
| pGL3-DACH1-dS7 |                                          | GCGAAGATCTCTAAACAATCGCCCGCC            |
| pGL3-DACH1-dS8 |                                          | GCGAAGATCTGTAAGCAAAGCGTAATGTTC         |
| pGL3-DACH1-mS1 | CGAGTTCatcgtatGATAATTTGGGTTAATACTAGTGAGT | AATTATCtagtatGAACTCGGAGCAGAGACTCCG     |
| pGL3-DACH1-mS2 | CGGAGTCgagtagaCGAGTTCCTGGTTGATAATT       | GAACTCGtctactGACTCCGAGAGCGCGAGA        |
| pGL3-DACH1-mS3 | TCTCTGCTCatctggaCTGGTTGGATAATTTGG        | TCCAACCAGtcagatGAGCAGAGACTCCGAGAGC     |
| pGL3-DACH1-mS4 | TTCTGGTTGtcgccggTGGGTTAATACTAGTGAGTGAGGT | TTAACCCAcggcgaCAACCAGGAAGCTCGGAGC      |
| pGL3-DACH1-mS5 | GATAATTgtttggcATACTAGTGAGTGAGGTTTTTGC    | ACTAGTATGCCAAACAATTATCCAACCAGGAAGCTCGG |

Note: Lowercases in primer sequence represent mutation sites.

**Table S2.** The primers for DACH1 shRNA lentivirus vectors

| Vector        | Sense primer (5'-3')                    | Antisense primer (5'-3')                       |
|---------------|-----------------------------------------|------------------------------------------------|
| DACH1-shRNA01 | GATCCGCCTCCTAAGAGGACTCAACTTCCTGTCAGATTG | AATTCAAAAAGCCTCCTAAGAGGACTCAATCTGACAGGAAGTTG   |
| DACH1-shRNA02 | GATCCGCACTTGAGTTTGAGACGACTTCCTGTCAGA    | AATTCAAAAAGCACTTGAGTTTGAGACGATCTGACAGGAAGTCGT  |
| DACH1-shRNA03 | GATCCCTGTTGAAAGTTGCCATAGCTTCCTGTCAGACTA | AATTCAAAAAGCTGTTGAAAGTTGCCATAGTCTGACAGGAAGCTAT |

**Table S3.** The primers for DACH1 SUMOylation site-directed mutation

| Primer     | Sequence (5'-3')              |
|------------|-------------------------------|
| DACH1-mSF1 | AAGGTGAAAAAAATCagaTTAGAAGCCAT |
| DACH1-mSR3 | AGTTGCTCATGGCTTCTAActtGATT    |
| DACH1-mSF1 | CTGGAAAAAACTGAGCTGaggATGGATT  |
| DACH1-mSR1 | TCTTCCCTTAAAAAATCCATcctCAGCTC |
| DACH1-mSF1 | TAGTTCAAAAGAGGCTAaggAAGGAG    |
| DACH1-mSR2 | TGCCTTCTTCTCCTTcctTAGCCT      |

Note: Lowercases in the sequence represent the lysine to be mutated.
